# Supplementary material
Source: PubMed Central journal article supplement (PMC2754143)
Supplement: NIHMS132487-supplement-01.pdf [file NIHMS132487-supplement-01.pdf]

**Supplementary material.****PREDICTING ADHERENCE TO TREATMENT FOR METHAMPHETAMINE DEPENDENCE FROM NEUROPSYCHOLOGICAL AND DRUG USE VARIABLES.**

Dean, A.C., London, E.D., Sugar, C.A., Kitchen, C.M.R., Swanson, A.-N., Heinzerling, K.G., Kalechstein, A.D., Shoptaw, S. Drug Alcohol Depend

This material supplements but does not replace the content of the peer-reviewed paper published in Drug and Alcohol Dependence.

*Univariate associations between baseline variables and the number of methamphetamine (MA) abstinent weeks and study completion.*

| <b>Variable Type</b>                                      | <b>Measure</b> | <b>Weeks Abstinent</b> | <b>Study Completion</b> |
|-----------------------------------------------------------|----------------|------------------------|-------------------------|
| <b>Demographics</b>                                       |                |                        |                         |
| Age                                                       | ASI            | NS                     | NS                      |
| Gender <sup>a</sup>                                       | ASI            | NS                     | NS                      |
| Ethnicity <sup>a</sup>                                    | ASI            | NS                     | NS                      |
| Years of Education                                        | ASI            | NS                     | NS                      |
| <b>Cognitive Performance</b>                              |                |                        |                         |
| SRT mean reaction time                                    | SRT            | NS                     | NS                      |
| CRT mean reaction time                                    | CRT            | NS                     | NS                      |
| CRT total errors                                          | CRT            | NS                     | NS                      |
| Decision-making speed (mean CRT – mean SRT)               | CRT/SRT        | NS                     | NS                      |
| 1-back mean reaction time                                 | N-Back         | NS                     | NS                      |
| 1-back total errors                                       | N-Back         | NS                     | t(52) = 2.10*           |
| 1-back total trials correct                               | N-Back         | NS                     | NS                      |
| 2-back mean reaction time                                 | N-Back         | NS                     | NS                      |
| 2-back total errors                                       | N-Back         | NS                     | NS                      |
| 2-back total trials correct                               | N-Back         | NS                     | NS                      |
| <b>Treatment</b>                                          |                |                        |                         |
| Bupropion or placebo administration <sup>a</sup>          | ---            | NS                     | NS                      |
| Treatment site <sup>a</sup>                               | ---            | NS                     | NS                      |
| <b>Drug Usage</b>                                         |                |                        |                         |
| Number of MA-free urine screens during baseline           | Urine          | r = .58***             | t(58) = -3.00**         |
| Frequency of initial MA use (freq/infreq) <sup>a, b</sup> | Urine          | t(58) = 4.61***        | $\chi^2 = 12.61$ ***    |
| Drug screen on first baseline day (pos/neg) <sup>a</sup>  | Urine          | t(58) = 3.29**         | $\chi^2 = 4.78$ *       |
| Drug index score                                          | ASI            | NS                     | NS                      |
| MA craving                                                | VAS            | NS                     | NS                      |
| Days of MA use in the 30 days before baseline             | ASI            | r = -.27*              | NS                      |
| Years of MA use                                           | ASI            | NS                     | NS                      |
| Money spent on drugs in last 30 days                      | ASI            | NS                     | NS                      |
| Typical route of MA use <sup>a</sup>                      | ASI            | NS                     | NS                      |
| Self-rated severity of MA dependence                      | CGI            | r = -.25*              | NS                      |
| Experimenter-rated severity of MA dependence              | CGI            | NS                     | NS                      |
| Degree bothered by drug problems in last 30 days          | ASI            | NS                     | NS                      |
| Days had problems due to drugs in last 30 days            | ASI            | NS                     | NS                      |
| Importance of getting treatment for drug abuse            | ASI            | NS                     | NS                      |

|                                                     |      |                |                   |
|-----------------------------------------------------|------|----------------|-------------------|
| Number of lifetime drug treatments                  | ASI  | $r = .29^*$    | NS                |
| Alcohol Index score                                 | ASI  | NS             | NS                |
| Days of alcohol use in last 30 days                 | ASI  | NS             | NS                |
| Years of alcohol use                                | ASI  | NS             | NS                |
| Number of lifetime alcohol treatments               | ASI  | $r = .37^{**}$ | NS                |
| Days treated for drugs/alcohol in last 30 days      | ASI  | $r = .38^{**}$ | NS                |
| Marijuana dependence or abuse (yes/no) <sup>a</sup> | SCID | NS             | NS                |
| Days of marijuana use in last 30 days               | ASI  | NS             | NS                |
| Years of marijuana use                              | ASI  | NS             | NS                |
| Days of polysubstance use in last 30 days           | ASI  | NS             | NS                |
| Years of polysubstance use                          | ASI  | NS             | NS                |
| Cigarettes smoked per day                           | SUI  | NS             | NS                |
| Years smoked cigarettes                             | PI   | NS             | NS                |
| Nicotine dependence total score                     | FG   | NS             | $t(37) = -2.18^*$ |

### Mood/Psychiatric Function

|                                                               |       |    |                      |
|---------------------------------------------------------------|-------|----|----------------------|
| Substance-induced psych disorder (yes/no) <sup>a</sup>        | SCID  | NS | NS                   |
| Psych index score                                             | ASI   | NS | NS                   |
| Depression Total Score                                        | BDI-2 | NS | NS                   |
| Obsessive-Compulsive subscale                                 | BSI   | NS | NS                   |
| Depression subscale                                           | BSI   | NS | NS                   |
| Anxiety subscale                                              | BSI   | NS | NS                   |
| Hostility subscale                                            | BSI   | NS | NS                   |
| Phobic Anxiety subscale                                       | BSI   | NS | NS                   |
| Paranoid Ideation subscale                                    | BSI   | NS | NS                   |
| Psychoticism subscale                                         | BSI   | NS | NS                   |
| Interpersonal sensitivity subscale                            | BSI   | NS | NS                   |
| Somatization subscale                                         | BSI   | NS | NS                   |
| Global Severity Index                                         | BSI   | NS | NS                   |
| Depressed in last 30 days (yes/no) <sup>a</sup>               | ASI   | NS | $\chi^2 = 6.57^*$    |
| Significant depression in lifetime (yes/no) <sup>a</sup>      | ASI   | NS | $\chi^2 = 8.93^{**}$ |
| Anxiety in last 30 days (yes/no) <sup>a</sup>                 | ASI   | NS | NS                   |
| Significant anxiety in lifetime (yes/no) <sup>a</sup>         | ASI   | NS | NS                   |
| Number of lifetime inpatient psych treatments                 | ASI   | NS | NS                   |
| Number of lifetime outpatient psych treatments                | ASI   | NS | NS                   |
| Problem with violence/rage last 30 days (yes/no) <sup>a</sup> | ASI   | NS | NS                   |
| Problem with violence/rage in lifetime (yes/no) <sup>a</sup>  | ASI   | NS | NS                   |
| Days with psychological problems in last 30 days              | ASI   | NS | NS                   |
| Thoughts of suicide in last 30 days (yes/no) <sup>a</sup>     | ASI   | NS | NS                   |
| Serious thoughts of suicide in lifetime (yes/no) <sup>a</sup> | ASI   | NS | NS                   |
| Importance of receiving psych treatment now                   | ASI   | NS | NS                   |

### Employment/Functional Status

|                                                              |      |    |    |
|--------------------------------------------------------------|------|----|----|
| Global Assessment of Function (GAF; Axis V)                  | SCID | NS | NS |
| Employment index score                                       | ASI  | NS | NS |
| Longest full-time job in years                               | ASI  | NS | NS |
| Typical employment (e.g., full-time, part-time) <sup>a</sup> | ASI  | NS | NS |
| Typical job category (e.g., executive, student) <sup>a</sup> | ASI  | NS | NS |
| Days paid for work in last 30 days                           | ASI  | NS | NS |
| Net pay earned in last 30 days                               | ASI  | NS | NS |

|                                                                 |     |               |               |
|-----------------------------------------------------------------|-----|---------------|---------------|
| Welfare money received in last 30 days                          | ASI | NS            | NS            |
| Illegal income received in last 30 days                         | ASI | NS            | NS            |
| Days with employment problems in last 30 days                   | ASI | NS            | NS            |
| Function limited in school or work (yes/no) <sup>a</sup>        | QWB | NS            | NS            |
| Function limited in hobbies or recreation (yes/no) <sup>a</sup> | QWB | NS            | NS            |
| <b>Legal Status</b>                                             |     |               |               |
| Legal index score                                               | ASI | NS            | t(58) = 2.37* |
| Currently on probation or parole (yes/no) <sup>a</sup>          | ASI | NS            | NS            |
| Number of lifetime drug-related charges                         | ASI | NS            | NS            |
| Number of lifetime convictions                                  | ASI | NS            | NS            |
| Number of months incarcerated in lifetime                       | ASI | NS            | NS            |
| Days profit by illegal means in last 30 days                    | ASI | NS            | NS            |
| <b>Social Context</b>                                           |     |               |               |
| Family/social index score                                       | ASI | NS            | NS            |
| Live with someone with alcohol problem (yes/no) <sup>a</sup>    | ASI | t(57) = 3.25* | NS            |
| Live with someone who uses drugs (yes/no) <sup>a</sup>          | ASI | NS            | NS            |
| Physically abused in last 30 days (yes/no) <sup>a</sup>         | ASI | NS            | NS            |
| Physically abused in lifetime (yes/no) <sup>a</sup>             | ASI | NS            | NS            |
| Sexually abused in last 30 days (yes/no) <sup>a</sup>           | ASI | NS            | NS            |
| Sexually abused in lifetime (yes/no) <sup>a</sup>               | ASI | NS            | NS            |
| Days of conflicts with family in last 30 days                   | ASI | NS            | NS            |
| Days of conflicts with non-family in last 30 days               | ASI | NS            | t(58) = 2.40* |
| How bothered by family problems in last 30 days                 | ASI | NS            | NS            |
| How bothered by social problems in last 30 days                 | ASI | NS            | NS            |
| <b>Medical Status</b>                                           |     |               |               |
| Medical index score                                             | ASI | NS            | NS            |
| Days with medical problems in last 30 days                      | ASI | NS            | NS            |
| HIV+ (yes/no) <sup>a</sup>                                      | PI  | NS            | NS            |
| Hepatitis + (yes/no) <sup>a</sup>                               | PI  | NS            | NS            |
| Rating of current health from 0 to 100                          | QWB | NS            | NS            |
| Rating of current health compared to last year                  | QWB | NS            | NS            |

Note: ASI = Addiction Severity Index—Lite; SRT = Simple Reaction Time; CRT = Choice Reaction Time; Urine = urinalysis for methamphetamine; VAS = Visual Analog Scale; CGI = Clinical Global Impression; SCID = Structured Clinical Interview for the DSM-IV-TR; SUI = Substance Use Inventory; PI = Physician Interview; FG = Fagerstrom Test of Nicotine Dependence; BDI-2 = Beck Depression Inventory-2; BSI = Brief Symptom Inventory; QWB = Quality of Well-Being—Self Administration Version.

<sup>a</sup> Denotes a categorical scale of measurement. All other variables were on a continuous scale.

<sup>b</sup> Frequency of initial MA use: *Infrequent*:  $\leq 2$  positive MA urines during first two study weeks (i.e., baseline). *Frequent*:  $> 2$  positive tests.

NS = Nonsignificant  $p > .05$

r = Pearson correlation

t = independent samples t-test

$\chi^2$  = chi-square test

\*  $p < .05$  uncorrected

\*\*  $p < .01$  uncorrected

\*\*\*  $p < .001$  uncorrected
